1                    **Microtubule-dependent transport of arenavirus matrix protein**  
2                    **demonstrated using live-cell imaging microscopy**

3                    Yuki Takamatsu<sup>1, 2</sup>, Junichi Kajikawa<sup>1</sup>, Yukiko Muramoto<sup>1</sup>, Masahiro Nakano<sup>1</sup>,  
4                    Takeshi Noda<sup>1\*</sup>

5  
6                    <sup>1</sup>Laboratory of Ultrastructural Virology, Institute for Frontier Life and Medical  
7                    Sciences, Kyoto University, Japan

8                    <sup>2</sup>Institut für Virologie, Philipps-Universität Marburg, Germany;

9  
10                    \*Corresponding author:

11                    Takeshi Noda

12                    Laboratory of Ultrastructural Virology

13                    Institute for Frontier Life and Medical Sciences

14                    Kyoto University

15                    Japan

16 Tel.: +49 6421/28-66254

17 Fax.: +49 6421/28-68962

18 Email: [t-noda@kyoto-uni.ac.jp](mailto:t-noda@kyoto-uni.ac.jp)

19

20 **Abstract**

21 Lassa virus (LASV), belonging to the family *Arenaviridae*, causes severe  
22 haemorrhagic manifestations and is associated with a high mortality rate in  
23 humans. Thus, it is classified as a biosafety level (BSL)-4 agent. Since counter  
24 measures for LASV diseases are yet to be developed, it is important to elucidate  
25 the molecular mechanisms underlying the life cycle of the virus, including its viral  
26 and host cellular protein interactions. These underlying molecular mechanisms  
27 may serve as the key for developing novel therapeutic options. Lymphocytic  
28 choriomeningitis virus (LCMV), a close relative of LASV, is usually asymptomatic  
29 and is categorised as a BSL-2 agent. In the present study, we visualised the  
30 transport of viral matrix Z protein in LCMV-infected cells using live-cell imaging  
31 microscopy. We demonstrated that the transport of Z protein is mediated by  
32 polymerised microtubules. Interestingly, the transport of LASV Z protein showed  
33 characteristics similar to those of Z protein in LCMV-infected cells. The live-cell  
34 imaging system using LCMV provides an attractive surrogate measure for  
35 studying arenavirus matrix protein transport in BSL-2 laboratories. In addition, it  
36 could be also utilised to analyse the interactions between viral matrix proteins

37 and the cellular cytoskeleton, as well as to evaluate the antiviral compounds that

38 target the transport of viral matrix proteins.

39



## 40 **Introduction**

41           The family arenavirus contains at least 41 recognised species with single-  
42 stranded ambisense RNA genomes (1). Their considerable impact on human  
43 health should not to be underestimated, as described in a review by Wolff, *et al.*  
44 (2). In this family, the Lassa virus (LASV), which causes the haemorrhagic Lassa  
45 fever, is a major public health concern due to its potential to cause international  
46 epidemics (3-8). LASV is prevalent in West Africa, and over 500 cases of Lassa  
47 fever were confirmed in Nigeria in 2018 (8). The only available drug for the  
48 treatment of Lassa fever is ribavirin, which despite being partially effective, has  
49 significant side effects, including haemolytic anaemia (9). Due to the lack of  
50 effective prevention and counter measures, LASV is classified as a biosafety level  
51 4 (BSL-4) microorganism. A BSL-4 facility requires specific biosafety  
52 management and laboratory design, including controlled access and air and  
53 drainage systems, which must meet international and national regulations (10).  
54 Lymphocytic choriomeningitis virus (LCMV), a close relative of LASV, is generally  
55 asymptomatic in healthy individuals and is categorised as a BSL-2  
56 microorganism. Thus, LCMV can be used as an alternative to analyse the

57 molecular mechanisms of each replication step during LASV infection (11-13).

58 Arenavirus particles have a spherical or pleomorphic morphology, with a diameter  
59 ranging from 60 to 300 nm. Two segments (small and large) of viral RNA encode  
60 the following four viral proteins: the surface glycoprotein GP and nucleoprotein  
61 NP are encoded by the small segment, while the large segment encodes the  
62 polymerase L and matrix protein Z (Fig. 1a). The ribonucleoprotein complexes  
63 (RNPs) are formed by genomic RNA segments associated with NP and L (Fig.  
64 1b). Transcription and replication of viral genome occurs in the host cell  
65 cytoplasm, and are achieved by the RNPs (14). Z protein downregulates these  
66 processes through its interaction with the viral polymerase (13, 15, 16). In addition,  
67 Z protein plays a crucial role in virion assembly and release (2, 13, 17). Although  
68 the importance of viral late domain motifs in Z protein and the interaction of Z  
69 protein with the cellular endosomal sorting complexes required for transport  
70 (ESCRT) for virion formation and budding have been well studied (2, 13, 17-22),  
71 the transport of Z proteins is been yet fully understood. In the present study, we  
72 performed live-cell imaging analyses of Z protein transport in LCMV-infected cells  
73 and characterised the movement both over short time period (within 3 min,

74 denoted “short duration”) and long time period (up to 12 h, denoted “long  
75 duration”). We also characterised the movement of LASV Z protein in plasmid-  
76 transfected cells.

## 77 **Materials and methods**

### 78 **Cell culture**

79 Huh-7 (human hepatoma) cells were maintained in Dulbecco's Modified Eagle  
80 Medium (DMEM, Life Technologies) containing 10% (vol/vol) fetal bovine serum  
81 (FBS, PAN Biotech), 5 mM L-glutamine (Q; Life Technologies), 50 U/mL penicillin,  
82 and 50 µg/mL streptomycin (PS; Life Technologies), grown at 37 °C with 5% CO<sub>2</sub>.  
83 A maintenance medium, containing DMEM supplemented with 3% FBS and Q/PS,  
84 was used for cultivation after cell growth.

85

### 86 **Virus infection**

87 LCMV Armstrong 53b strain (GenBank accession number: P18541) was  
88 propagated in BHK-21 cells. The titre was determined by a plaque assay using  
89 Vero cells (12). For live-cell imaging,  $2 \times 10^5$  Huh-7 cells were grown in a 35 mm  
90 dish (ibidi) with growth medium. Prior to virus inoculation, the growth medium was  
91 replaced with the maintenance medium (DMEM with Q/PS) and virus infection  
92 was achieved at a multiplicity of infection (MOI) of 1. After incubating for 1 h at

93 37 °C with 5% CO<sub>2</sub>, the virus inoculum was replaced with the maintenance  
94 medium.

95

## 96 **Plasmids and transfection**

97 To generate the fluorescence-conjugated LCMV Z protein encoding plasmid  
98 (pCAGGS-Z-TagRFP), the TagRFP ORF was cloned in-frame to the 3' end of  
99 the Z gene, as previously described (23). The fluorescence-conjugated LASV Z  
100 protein, pCAGGS-Z-GFP, was kindly provided by Dr. Kawaoka (Tokyo University).

101 The plasmid DNA and transfection reagent TranSIT (Mirus) were mixed in 100 µL  
102 Opti-MEM without phenol red (Life Technologies) and added to the Huh-7 cells  
103 according to the manufacturer's instructions.

104

## 105 **Live-cell imaging microscopy**

106 Huh-7 cells at a cell density of  $2 \times 10^5$  were seeded in a 35 mm dish (ibidi) and  
107 cultivated in DMEM/PS/Q with 10% FBS. To analyse the movement of LCMV Z  
108 protein, first the cells were infected with the virus, as described above. At 1 h

109 post-infection (h.p.i.), pCAGGS-Z-TagRFP (1  $\mu$ g) was transfected. The medium  
110 was removed at 24 h post-transfection (h.p.t.) and 500  $\mu$ L of live-cell imaging  
111 medium (containing CO<sub>2</sub>-independent Leibovitz's medium (Life Technologies)  
112 with PS/Q, non-essential amino acid solution, and 0.5 % (vol/vol) FBS) was  
113 added. To analyse the movement of LASV Z proteins, pCAGGS-Z-GFP (1  $\mu$ g)  
114 was transfected. The same procedures as those described above were carried  
115 out, except for viral infection. The live-cell time-lapse experiments were recorded  
116 using GE healthcare Delta Vision Elite with a 60 $\times$  oil objective in a biosafety level-  
117 2 laboratory. The movement of the proteins for the short duration was recorded  
118 at 1 s intervals, for a total of 2-3 min. The movement of the protein for the long  
119 duration was recorded at 15 min intervals, for a total of 12 h.

120

### 121 **Treatment of cells with cytoskeleton-modulating drugs**

122 Cells were treated with 15  $\mu$ M nocodazole (Sigma), 0.3  $\mu$ M cytochalasin D  
123 (Sigma), or 0.15% dimethyl sulfoxide (DMSO, Sigma) (24). These chemicals  
124 were added to the live-cell imaging medium 3 h prior to observation.

125

126 **Image processing and analysis**

127 The images and movie sequences obtained through the observation were  
128 processed and analysed manually using the Fiji plug-in “MTrackJ” (25, 26).

129

## 130 **Results and Discussion**

### 131 **Visualization of Z protein transport in LCMV-infected cells**

132           Although the transport of LASV Z protein is known to be regulated by a  
133 microtubule-dependent motor protein, KIF13A (27), the characteristics of  
134 arenavirus Z protein transport during viral infection have not yet been fully  
135 elucidated. In cells infected with the Ebola and Marburg viruses, fluorescence-  
136 conjugated matrix proteins have been previously used to visualise the transport  
137 of viral proteins in virus-infected cells (23, 24). In the present study, we used  
138 these live-cell imaging methods, previously used with filoviruses, to observe  
139 arenaviruses.

140           Huh-7 cells are flat in shape and are suitable for tracking the movement of  
141 proteins using live-cell imaging. First, these cells were infected with LCMV at a  
142 MOI of 1 and transfected with 1  $\mu$ g of pCAGGS-Z-TagRFP at 1 h p.i (Fig. 1c).  
143 Next, time-lapse images were acquired at 1 s intervals for a total of 2-3 min, from  
144 24 h p.t. The length of the trajectories for the short duration (2 min) ranged from  
145 5 to 30  $\mu$ m, with a mean length of  $14 \pm 5.6 \mu$ m (Fig. 1e). The velocity of transport  
146 was 500 to 2500 nm/s, with a mean speed of  $1160 \pm 483$  nm/s (Fig. 1f),



147 suggesting that the transport of Z proteins was likely mediated by microtubules  
148 rather than actin cytoskeletons.

### 149 **LCMV Z protein transport along polymerised Tubulin**

150 Many viral proteins use the host cell cytoskeleton as a mode of transport  
151 (23, 28-30). Thus, cytoskeleton-modulating drugs are useful to analyse the  
152 intracytoplasmic transport of viral matrix proteins (24). Huh-7 cells were infected  
153 and transfected as described in Fig. 1c. The culture medium was then replaced  
154 at 24 h p.t. with a volume of 500  $\mu$ L CO<sub>2</sub>-independent Leibovitz's medium  
155 containing either 0.15% DMSO (control), 0.3  $\mu$ M of cytochalasin D (actin  
156 depolymerizing drug), or 0.15 M of nocodazole (microtubule depolymerizing drug),  
157 and the cells were incubated for 3 h with each drug. Time-lapse images were  
158 subsequently acquired at 1 s intervals for a total of 2-3 min (Fig. 2a). Cytochalasin  
159 D-treated cells were found to not alter the characteristics of Z protein movement  
160 in comparison to the control cells (Fig. 2b and 2c, Supplementary Movie 2 and 3).  
161 The mean length of the trajectories was  $15 \pm 5.5 \mu\text{m}$  and  $13 \pm 6.3 \mu\text{m}$  for DMSO-  
162 and cytochalasin D-treated cells, respectively (Fig. 2e and 2f). The mean velocity  
163 of transport was  $1130 \pm 404 \text{ nm/s}$  and  $1101 \pm 417 \text{ nm/s}$  for for DMSO- and

164 cytochalasin D-treated cells, respectively (Fig. 2h and 2i). Nocodazole treatment  
165 was found to immediately induce the cessation of Z protein movement, without  
166 any long distance transport (Fig. 2d, 2g, 2j, Supplementary Movie 4). These  
167 results indicate that arenaviruses Z proteins utilise polymerised microtubules for  
168 transport. The velocity of intracellular transport of LCMV Z proteins was within a  
169 similar range as intracellular-enveloped vaccinia virus transport, which is also  
170 mediated by microtubules (31-33).

#### 171 **LCMV Z protein transport over long duration**

172       Next, we analysed Z protein transport over long duration in Huh-7 cells.  
173 Time-lapse images were acquired over a period of 12 h at 15 min intervals after  
174 treating the cells with cytoskeleton-modulating drugs for 3 h. Consistent with the  
175 short duration experiments, Z protein transport was not restricted in control-  
176 treated cells, but was strictly regulated in nocodazole-treated cells (Fig. 3a, b).  
177 These results indicate that microtubule polymerisation is the key modulator for Z  
178 proteins over long duration in LCMV-infected cells. These results correlated with  
179 previous findings, which showed that nocodazole treatment induced a significant  
180 reduction in arenavirus production (27).

## 181 **Characterization of LASV Z protein transport in short and long durations**

182           To evaluate the relevance of our assay for highly pathogenic LASV, we  
183 analysed the intracellular movement of Z protein in LASV Z protein-expressing  
184 cells (Fig. 4a). Huh-7 cells were first transfected with 1 µg of pCAGGS-Z-GFP,  
185 followed by cytoskeleton-modulating drugs, as described above. Although neither  
186 DMSO nor cytochalasin D influenced Z protein movement, treatment with  
187 nocodazole abolished Z protein movement in the short duration (Fig. 4b, c, d).  
188 The transport of Z proteins was found to be mediated via polymerised  
189 microtubules in the long duration (Fig, 4e, f). Thus, our analysis of Z protein  
190 transport during LCMV infection could serve as an effective surrogate method for  
191 analysing LASV Z protein transport during LASV infection in BSL-4 laboratories.

192

## 193 **Concluding remarks**

194           Viruses utilise the cytoskeletons of infected cells to transport their  
195 components from the site of protein synthesis to the site of virus morphogenesis.  
196 In the present study, we established a live-cell imaging system for arenavirus Z

197 protein transport using fluorescence-conjugated Z proteins. As reported  
198 previously, the trafficking of LASV Z proteins is regulated by a microtubule-  
199 dependent motor protein (27). Our results correlated with these findings and  
200 provided direct evidence that the transport of LCMV and LASV Z proteins is  
201 restricted by microtubule polymerization. The live-cell imaging approach  
202 developed here provides an effective method for analysing interactions between  
203 arenavirus Z proteins and cellular cytoskeletons, as well as for evaluating antiviral  
204 compounds that target the transport of arenavirus matrix proteins.

205

206 **Acknowledgments**

207 The authors would like to extend their gratitude to Yoshihiro Kawaoka (Tokyo  
208 University) for providing the materials, and to Thomas Strecker (Philipps  
209 University Marburg, Germany) and Shuzo Urata (Nagasaki University, Japan) for  
210 the fruitful discussions.

211

212 **Funding**

213 The work was supported by the Japan Society for the Promotion of Science JSPS  
214 (grant no. 18J01631 and 19K16666) (to Y.T.); by the AMED Research Program  
215 on Emerging and Re-emerging Infectious Diseases; by the AMED Japanese  
216 Initiative for Progress of Research on Infectious Disease for global Epidemic; by  
217 the JSPS Core-to-Core Program A, the Advanced Research Networks; by the  
218 Grant for Joint Research Project of the Institute of Medical Science, University of  
219 Tokyo; by the Joint Usage/Research Center Program of the Institute for Frontier  
220 Life and Medical Sciences Kyoto University; by the Daiichi Sankyo Foundation of  
221 Life Science, and by the Takeda Science Foundation (to T.N.).



223 References

- 224 1. Maes P, Adkins S, Alkhovsky SV, Avsic-Zupanc T, Ballinger MJ, Bente DA, Beer  
225 M, Bergeron E, Blair CD, Briese T, Buchmeier MJ, Burt FJ, Calisher CH, Charrel  
226 RN, Choi IR, Clegg JCS, de la Torre JC, de Lamballerie X, DeRisi JL, Digiario M,  
227 Drebot M, Ebihara H, Elbeaino T, Ergunay K, Fulhorst CF, Garrison AR, Gao GF,  
228 Gonzalez JJ, Groschup MH, Gunther S, Haenni AL, Hall RA, Hewson R, Hughes  
229 HR, Jain RK, Jonson MG, Junglen S, Klempa B, Klingstrom J, Kormelink R,  
230 Lambert AJ, Langevin SA, Lukashevich IS, Marklewitz M, Martelli GP, Mielke-  
231 Ehret N, Mirazimi A, Muhlbach HP, Naidu R, Nunes MRT, et al. 2019. Taxonomy  
232 of the order Bunyavirales: second update 2018. *Arch Virol* 164:927-941.
- 233 2. Wolff S, Ebihara H, Groseth A. 2013. Arenavirus budding: a common pathway  
234 with mechanistic differences. *Viruses* 5:528-49.
- 235 3. Hirabayashi Y, Oka S, Goto H, Shimada K, Kurata T, Fisher-Hoch SP, McCormick  
236 JB. 1989. [The first imported case of Lassa fever in Japan]. *Nihon Rinsho* 47:71-  
237 5.
- 238 4. Gunther S, Emmerich P, Laue T, Kuhle O, Asper M, Jung A, Grewing T, ter  
239 Meulen J, Schmitz H. 2000. Imported lassa fever in Germany: molecular  
240 characterization of a new lassa virus strain. *Emerg Infect Dis* 6:466-76.
- 241 5. Schmitz H, Kohler B, Laue T, Drosten C, Veldkamp PJ, Gunther S, Emmerich P,  
242 Geisen HP, Fleischer K, Beersma MF, Hoerauf A. 2002. Monitoring of clinical and  
243 laboratory data in two cases of imported Lassa fever. *Microbes Infect* 4:43-50.
- 244 6. Amorosa V, MacNeil A, McConnell R, Patel A, Dillon KE, Hamilton K, Erickson  
245 BR, Campbell S, Knust B, Cannon D, Miller D, Manning C, Rollin PE, Nichol ST.  
246 2010. Imported Lassa fever, Pennsylvania, USA, 2010. *Emerg Infect Dis* 16:1598-  
247 600.
- 248 7. Atkin S, Anaraki S, Gothard P, Walsh A, Brown D, Gopal R, Hand J, Morgan D.  
249 2009. The first case of Lassa fever imported from Mali to the United Kingdom,  
250 February 2009. *Euro Surveill* 14.
- 251 8. Bhadelia N. 2019. Understanding Lassa fever. *Science* 363:30.
- 252 9. Damonte EB, Coto CE. 2002. Treatment of arenavirus infections: from basic  
253 studies to the challenge of antiviral therapy. *Adv Virus Res* 58:125-55.
- 254 10. WHO. 2004. *Laboratory Biosafety Manual-Third Edition*.
- 255 11. Iwasaki M, Ngo N, Cubitt B, Teijaro JR, de la Torre JC. 2015. *General Molecular*

- 256 Strategy for Development of Arenavirus Live-Attenuated Vaccines. *J Virol*  
257 89:12166-77.
- 258 12. Urata S, Kenyon E, Nayak D, Cubitt B, Kurosaki Y, Yasuda J, de la Torre JC,  
259 McGavern DB. 2018. BST-2 controls T cell proliferation and exhaustion by  
260 shaping the early distribution of a persistent viral infection. *PLoS Pathog*  
261 14:e1007172.
- 262 13. Urata S, Yasuda J. 2012. Molecular mechanism of arenavirus assembly and  
263 budding. *Viruses* 4:2049-79.
- 264 14. Dhanwani R, Huang Q, Lan S, Zhou Y, Shao J, Liang Y, Ly H. 2018.  
265 Establishment of Bisegmented and Trisegmented Reverse Genetics Systems to  
266 Generate Recombinant Pichinde Viruses. *Methods Mol Biol* 1604:247-253.
- 267 15. Strecker T, Maisa A, Daffis S, Eichler R, Lenz O, Garten W. 2006. The role of  
268 myristoylation in the membrane association of the Lassa virus matrix protein Z.  
269 *Virol J* 3:93.
- 270 16. Emonet SE, Urata S, de la Torre JC. 2011. Arenavirus reverse genetics: new  
271 approaches for the investigation of arenavirus biology and development of  
272 antiviral strategies. *Virology* 411:416-25.
- 273 17. Fehling SK, Lennartz F, Strecker T. 2012. Multifunctional nature of the  
274 arenavirus RING finger protein Z. *Viruses* 4:2973-3011.
- 275 18. Urata S, Weyer J, Storm N, Miyazaki Y, van Vuren PJ, Paweska JT, Yasuda J.  
276 2015. Analysis of Assembly and Budding of Lujo Virus. *J Virol* 90:3257-61.
- 277 19. Urata S, Ngo N, de la Torre JC. 2012. The PI3K/Akt pathway contributes to  
278 arenavirus budding. *J Virol* 86:4578-85.
- 279 20. Shtanko O, Watanabe S, Jasenosky LD, Watanabe T, Kawaoka Y. 2011.  
280 ALIX/AIP1 is required for NP incorporation into Mopeia virus Z-induced virus-  
281 like particles. *J Virol* 85:3631-41.
- 282 21. Urata S, Yasuda J, de la Torre JC. 2009. The z protein of the new world  
283 arenavirus tacaribe virus has bona fide budding activity that does not depend on  
284 known late domain motifs. *J Virol* 83:12651-5.
- 285 22. Urata S, Noda T, Kawaoka Y, Yokosawa H, Yasuda J. 2006. Cellular factors  
286 required for Lassa virus budding. *J Virol* 80:4191-5.
- 287 23. Takamatsu Y, Kolesnikova L, Becker S. 2018. Ebola virus proteins NP, VP35, and  
288 VP24 are essential and sufficient to mediate nucleocapsid transport. *Proc Natl*  
289 *Acad Sci U S A* 115:1075-1080.



- 290 24. Schudt G, Kolesnikova L, Dolnik O, Sodeik B, Becker S. 2013. Live-cell imaging  
291 of Marburg virus-infected cells uncovers actin-dependent transport of  
292 nucleocapsids over long distances. *Proc Natl Acad Sci U S A* 110:14402-7.
- 293 25. Schindelin J, Arganda-Carreras I, Frise E, Kaynig V, Longair M, Pietzsch T,  
294 Preibisch S, Rueden C, Saalfeld S, Schmid B, Tinevez JY, White DJ, Hartenstein  
295 V, Eliceiri K, Tomancak P, Cardona A. 2012. Fiji: an open-source platform for  
296 biological-image analysis. *Nat Methods* 9:676-82.
- 297 26. Meijering E, Dzyubachyk O, Smal I. 2012. Methods for cell and particle tracking.  
298 *Methods Enzymol* 504:183-200.
- 299 27. Fehling SK, Noda T, Maisner A, Lamp B, Conzelmann KK, Kawaoka Y, Klenk  
300 HD, Garten W, Strecker T. 2013. The microtubule motor protein KIF13A is  
301 involved in intracellular trafficking of the Lassa virus matrix protein Z. *Cell*  
302 *Microbiol* 15:315-34.
- 303 28. Sodeik B. 2000. Mechanisms of viral transport in the cytoplasm. *Trends Microbiol*  
304 8:465-72.
- 305 29. Smith GA, Enquist LW. 2002. Break ins and break outs: viral interactions with  
306 the cytoskeleton of Mammalian cells. *Annu Rev Cell Dev Biol* 18:135-61.
- 307 30. Ringel M, Heiner A, Behner L, Halwe S, Sauerhering L, Becker N, Dietzel E,  
308 Sawatsky B, Kolesnikova L, Maisner A. 2019. Nipah virus induces two inclusion  
309 body populations: Identification of novel inclusions at the plasma membrane.  
310 *PLoS Pathog* 15:e1007733.
- 311 31. Hollinshead M, Rodger G, Van Eijl H, Law M, Hollinshead R, Vaux DJ, Smith  
312 GL. 2001. Vaccinia virus utilizes microtubules for movement to the cell surface.  
313 *J Cell Biol* 154:389-402.
- 314 32. Herrero-Martinez E, Roberts KL, Hollinshead M, Smith GL. 2005. Vaccinia virus  
315 intracellular enveloped virions move to the cell periphery on microtubules in the  
316 absence of the A36R protein. *J Gen Virol* 86:2961-8.
- 317 33. Wang IH, Burckhardt CJ, Yakimovich A, Greber UF. 2018. Imaging, Tracking  
318 and Computational Analyses of Virus Entry and Egress with the Cytoskeleton.  
319 *Viruses* 10.

320

321

322 **Figure legend**

323 **Figure 1. Schematic diagram of arenavirus genome, virus particle, and live-**  
324 **cell imaging for Z proteins in Lymphocytic choriomeningitis virus infection.**

325 (a) Genome organization of arenaviruses. Arenaviruses genome composed of  
326 the small (S) RNA segment and the large (L) RNA segment, utilizing an  
327 ambisense coding strategy. The open reading frames are separated by intergenic  
328 regions. The S segment encodes NP and GPC. The L segment encodes L and  
329 Z. (b) Structure of arenavirus particle. RNPs are formed with viral RNA  
330 encapsidated by multiple NPs, and are associated with a polymerase L. Z protein  
331 forms a matrix layer underneath the viral membrane, where GPs are embedded.  
332 (c) Experimental setting for detecting Z protein transport. Huh-7 cells were  
333 infected with LCMV at MOI 1 and transfected with a plasmid encoding LCMV Z-  
334 TagRFP at 1 h p.i. Live-cell imaging microscopy was conducted 24 h p.t. (d)  
335 LCMV Z protein intracellular movement. The picture shows the maximum-  
336 intensity projection of time-lapse images of cells recorded for 3 min; images were  
337 captured every 1 s. (e) The length of selected Z proteins trajectories is shown

338 (n=20). The number indicates mean  $\pm$  SD ( $\mu\text{m}$ ). (e) The velocity of selected RNPs  
339 is shown (n=20). The number indicates mean  $\pm$  SD (nm/s).

340 **Figure 2. Characteristics of LCMV Z proteins transport in short duration.** (a)

341 Experimental setting to observe effects of cytoskeleton-modulating drugs on Z  
342 protein transport in LCMV-infected cells. Huh-7 cells were infected and  
343 transfected as described in Fig. 1(b), and treated either with DMSO (control),  
344 cytochalasin D, or nocodazole at 24 h p.i. After 3 h of treatment, observation was  
345 started. (b-d) Time-lapse images acquired in each drug-treated cell (b: DMSO,  
346 c: cytochalasin D, d: nocodazole). The pictures show the maximum-intensity  
347 projection of time-lapse images of cells recorded for 3 min; images were captured  
348 every 1 sec. (e-g) The length of selected Z proteins trajectories is shown in each  
349 drug treated cells (n=20, e: DMSO, f: cytochalasin D, g: nocodazole). The number  
350 indicates mean  $\pm$  SD ( $\mu\text{m}$ ). (h-j) The velocity of selected Z proteins transport is  
351 shown in each drug treated cell (n=20, h: DMSO, i: cytochalasin D, j: nocodazole).  
352 The number indicates mean  $\pm$  SD (nm/s).

353 **Figure 3. Z proteins transport in LCMV-infected cells over long duration.**

354 The effect of cytoskeleton-modulating drugs on LCMV Z protein transport for long

355 duration. Huh-7 cells were infected and transfected as described in Fig. 1(b), and  
356 treated either with DMSO (a), or nocodazole (b) at 24 h p.i. The cells were  
357 observed for 3-15 h after drug treatment; images were captured every 15 min  
358 over a duration of 12 h. The pictures show the cells at the indicated time post-  
359 observation.

360 **Figure 4. Characterization of Lassa virus Z proteins transport.** (a)

361 Experimental setting to observe LASV Z protein transport. (b-d) Huh-7 cells were  
362 transfected with pCAGGS-Z-GFP and treated either with DMSO (control),  
363 cytochalasin D, or nocodazole at 24 h p.i. Time-lapse images were acquired in  
364 each drug-treated cell (b: DMSO, c: cytochalasin D, d: nocodazole). The  
365 pictures indicate time-lapse images of cells recorded for 3 min; images were  
366 captured every 1 sec. (e,f) Effects of cytoskeleton-modulating drugs upon LASV  
367 Z proteins transport for long duration. Huh-7 cells were transfected as described  
368 in Fig. 4 (a), and treated either with DMSO (a), or nocodazole (b) at 24 h p.i. to  
369 the cells were observed for 3-15 h after drug treatment; images were captured  
370 every 15 min over a duration of 12 h. The pictures show the cells at the indicated  
371 time post-observation.

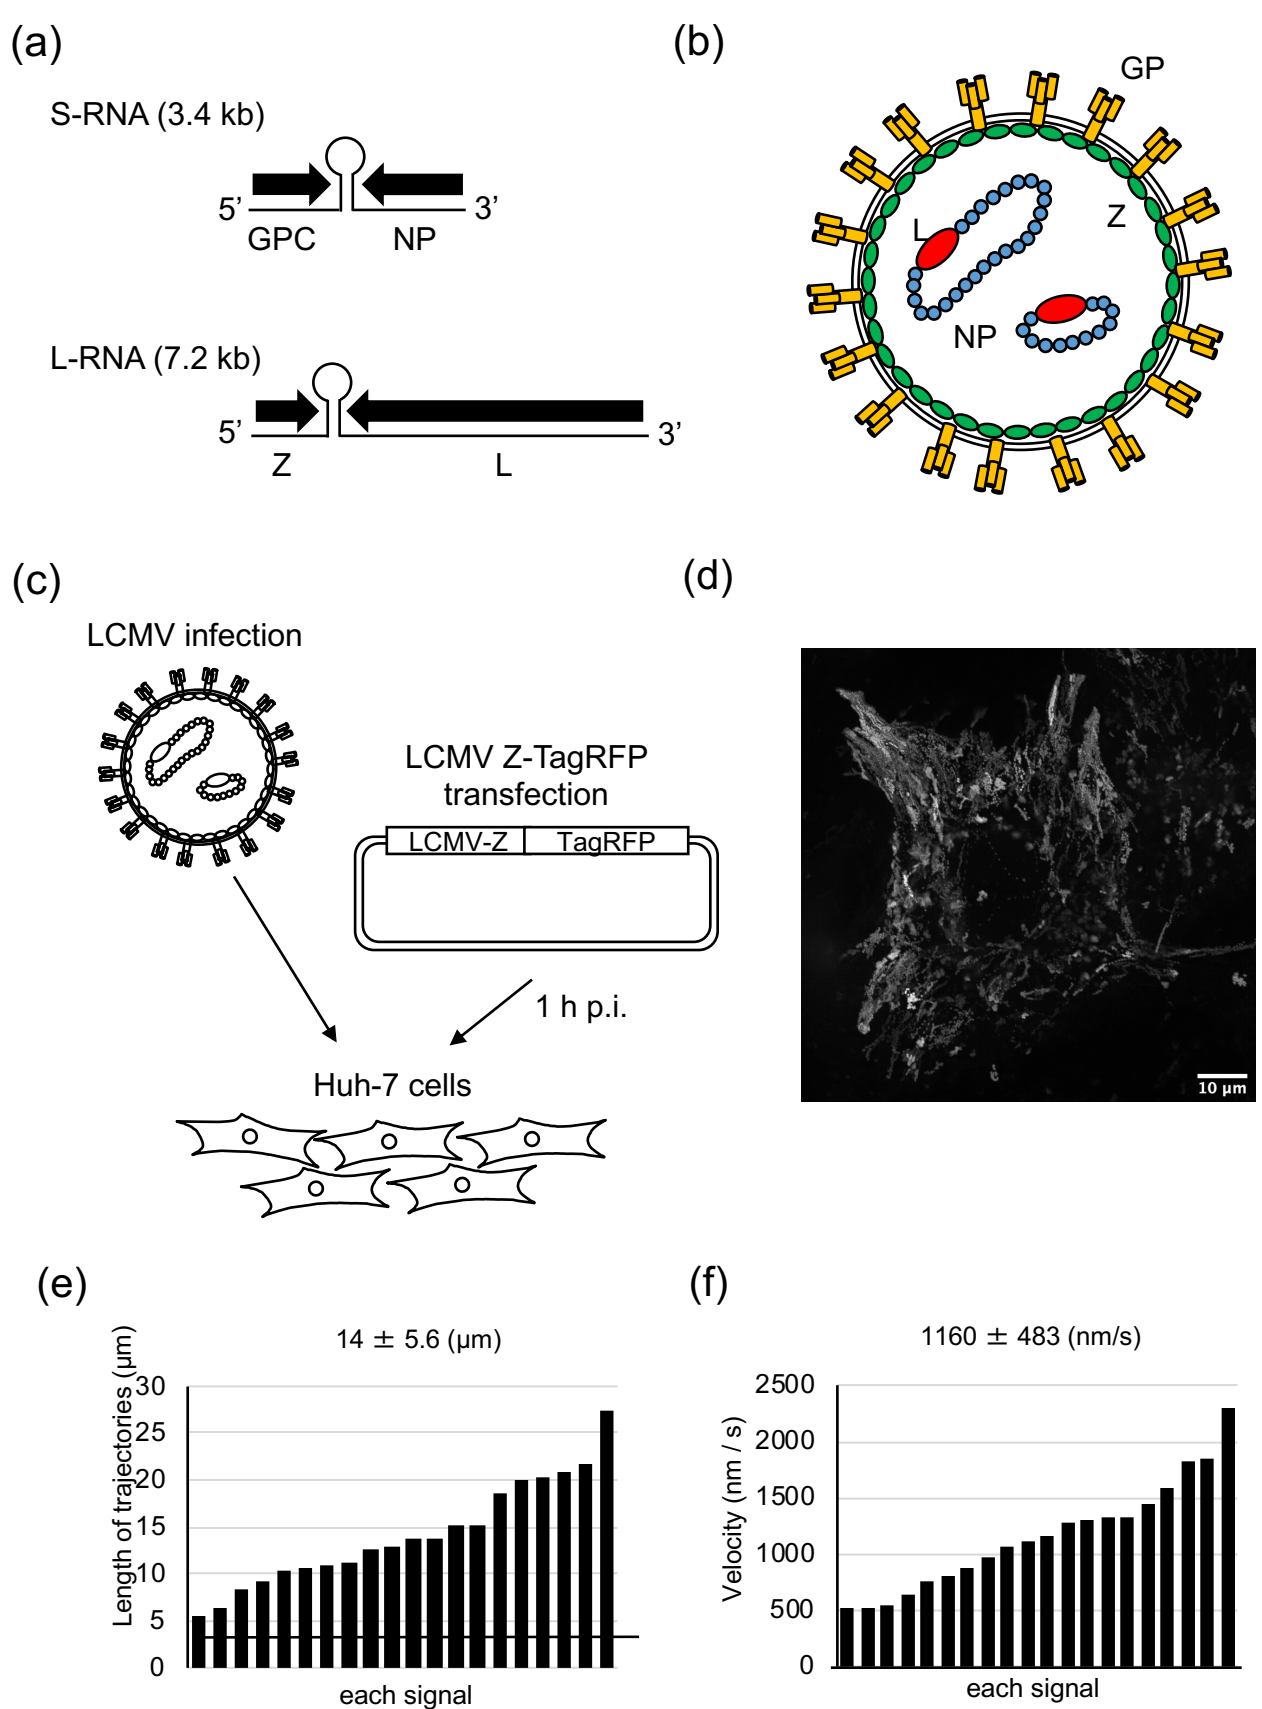

**Figure 1**

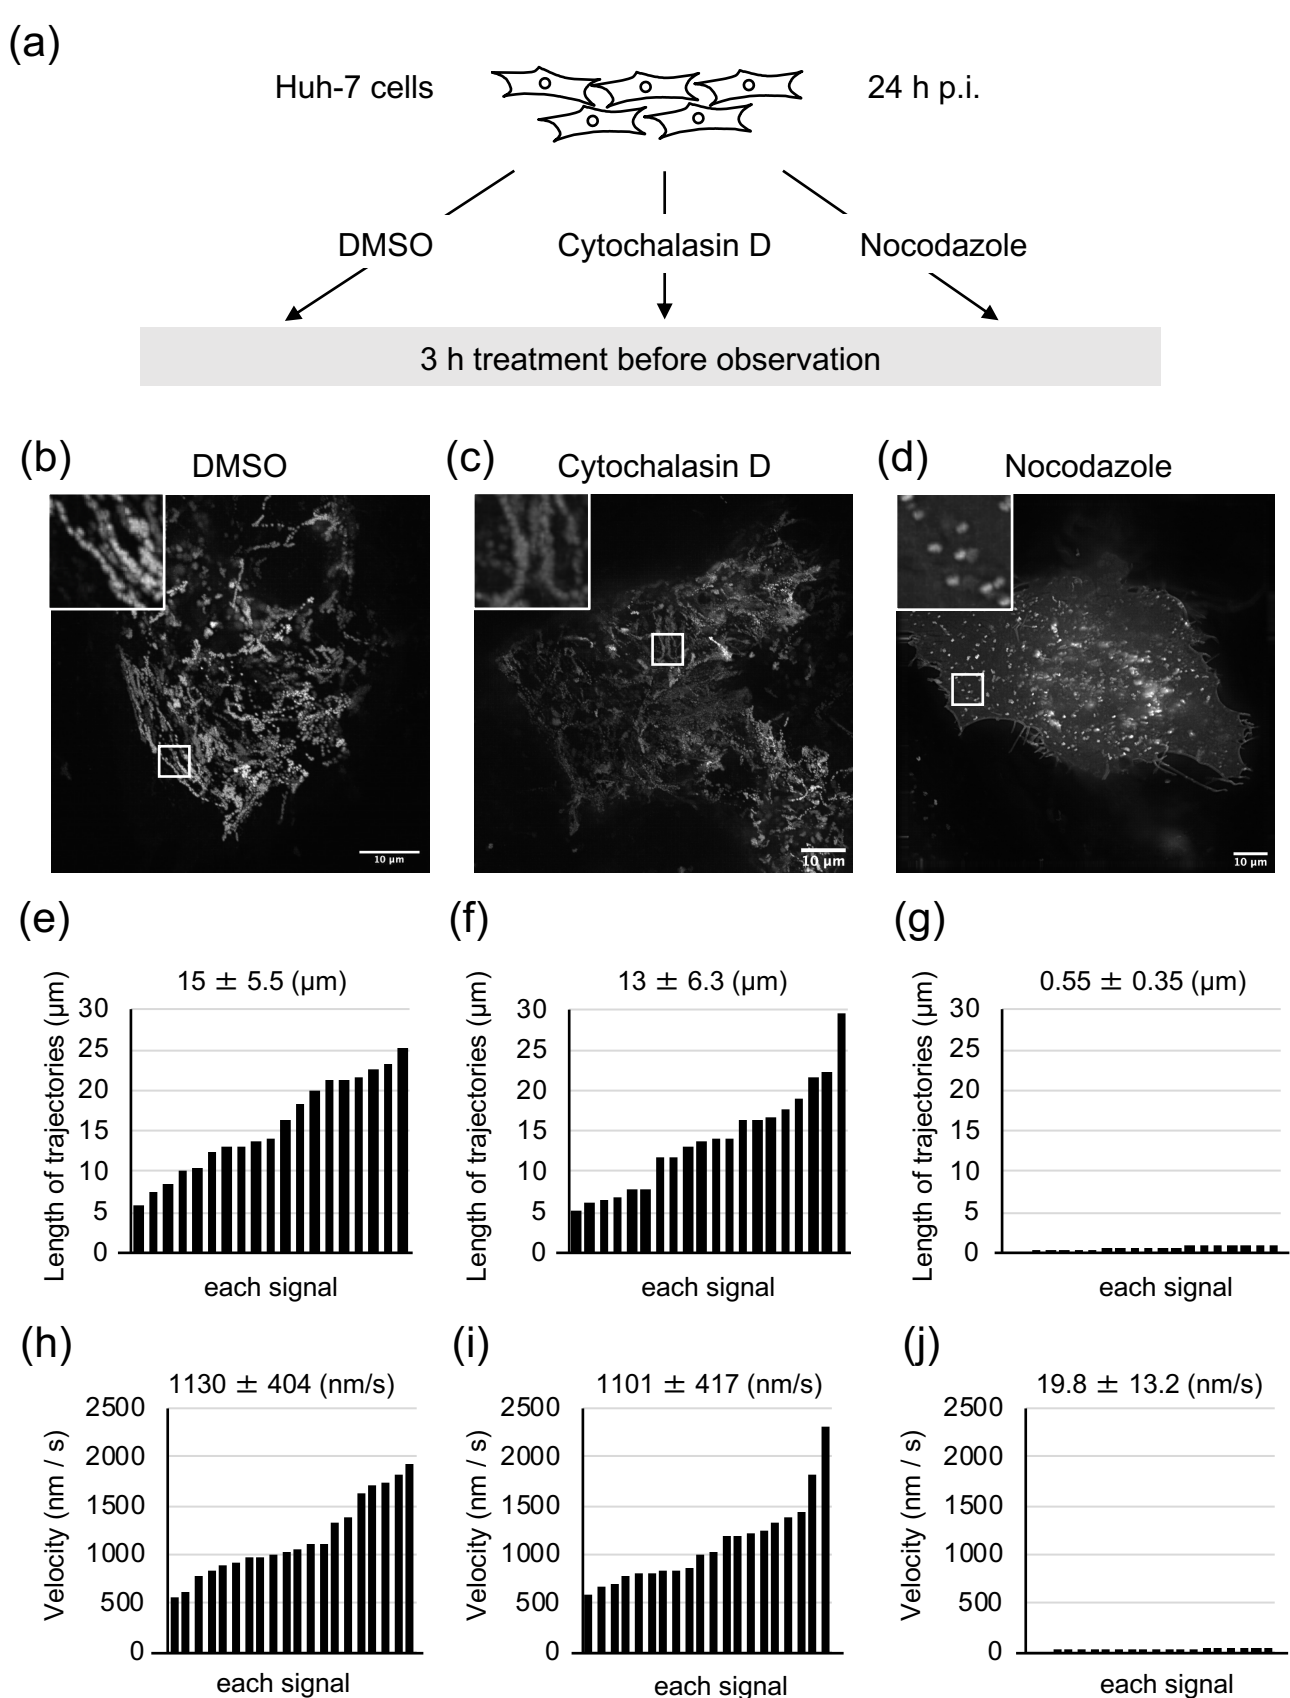

**Figure 2**

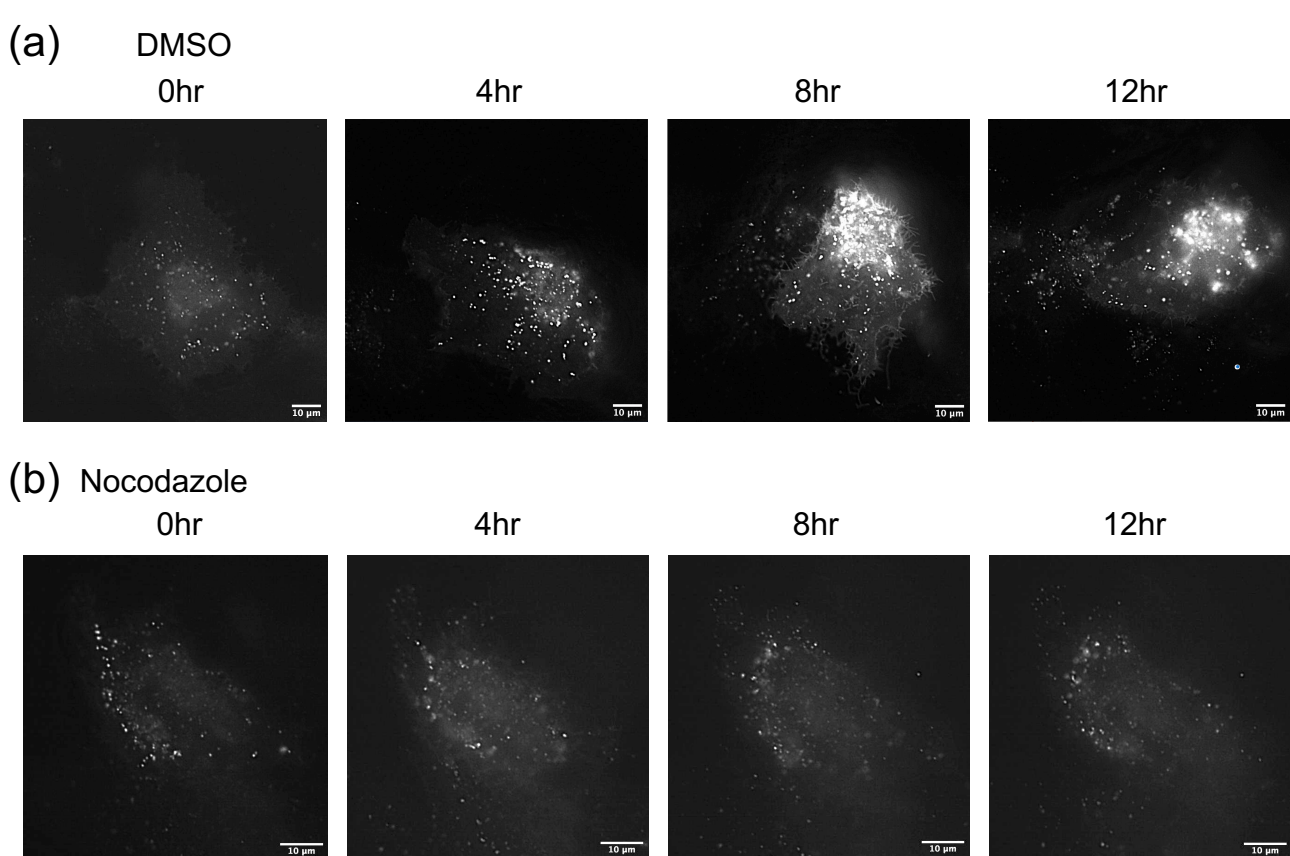

Figure 3



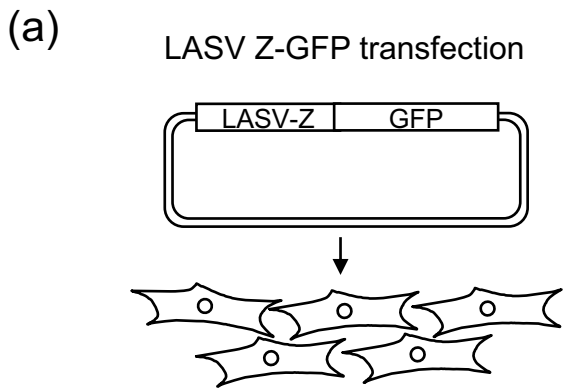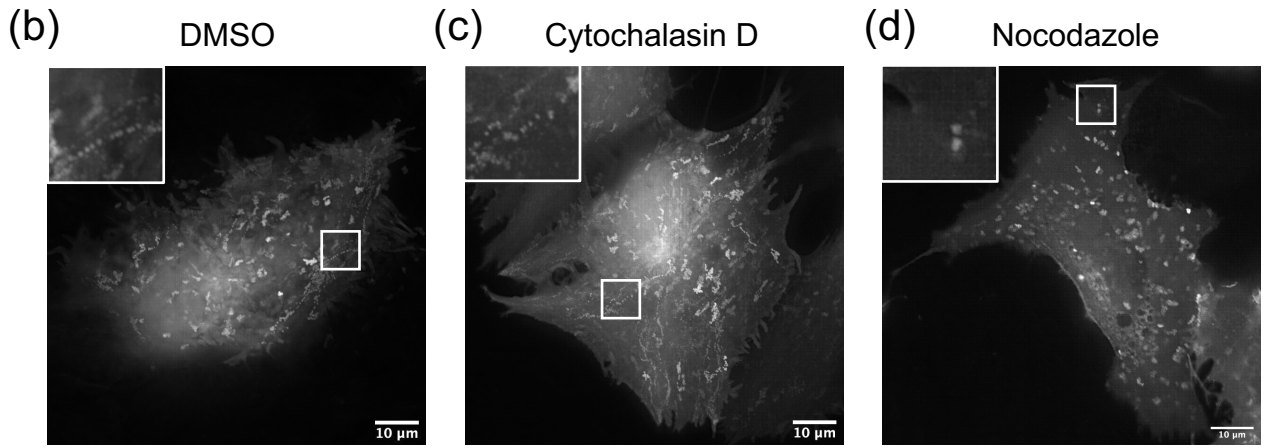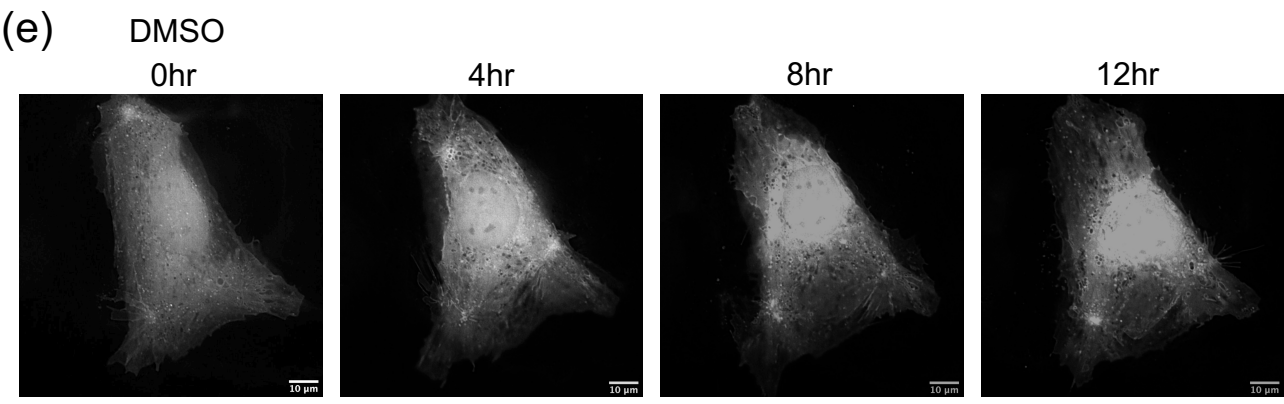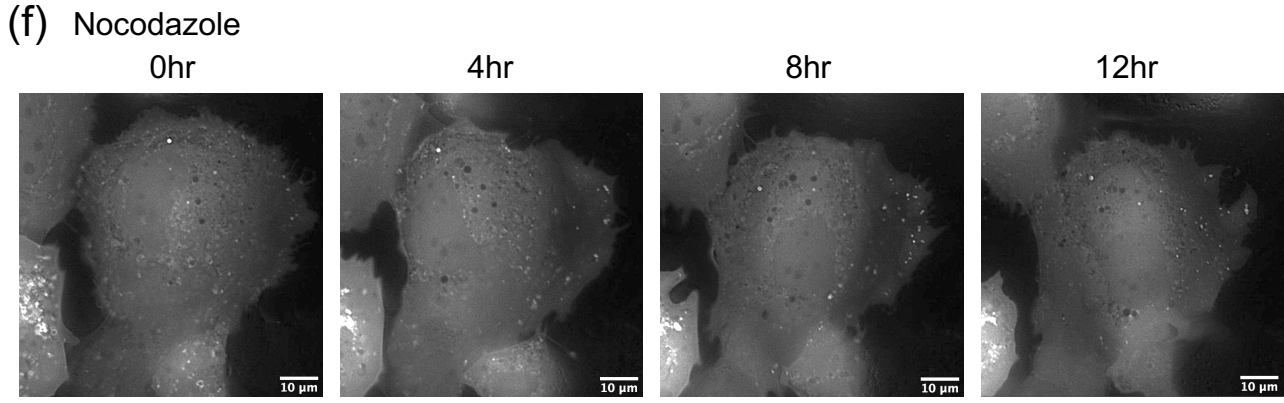

Figure 4
